# Supplementary material
Source: PubMed Central journal article supplement (PMC10082084)
Supplement: 41541_2023_653_MOESM2_ESM.pdf [file 41541_2023_653_MOESM2_ESM.pdf]

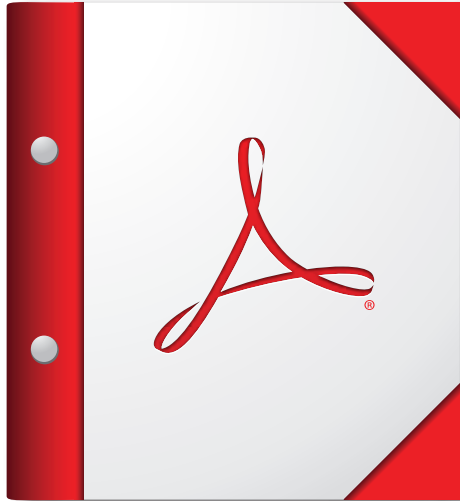

**For the best experience, open this PDF portfolio in  
Acrobat X or Adobe Reader X, or later.**

[Get Adobe Reader Now!](#)
